# Supplementary material
Source: Springer Nature journal article supplement (https://www.springermedizin.de/resource/supplementary/12865_2012_529_MOESM3_ESM.pdf/9428152)

**A**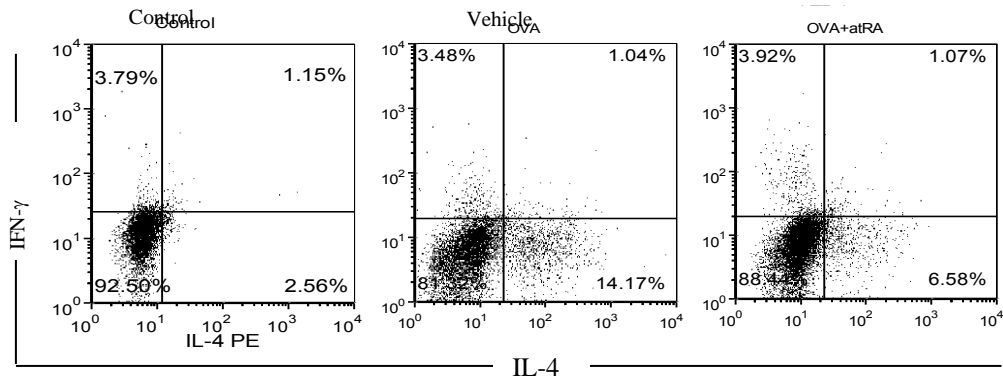**B**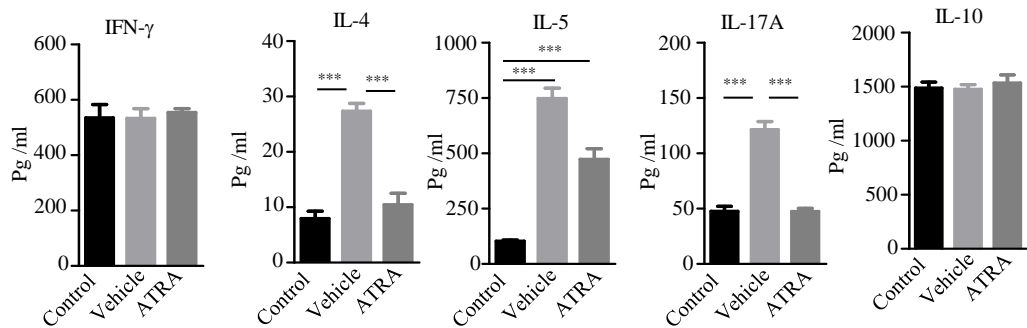

Supplement: MOESM3 [file 9428152]
